# Supplementary material for: Electronic structures of diamane doped with metal atoms
Source: Royal Society of Chemistry journal article supplement (doi:10.1039/d4tc02420f), 2024-01-01
Supplement: d4tc02420f1.pdf [file d4tc02420f1.pdf]

Supporting Information

*for*

**Electronic structures of diamane doped with metal atoms**

Shiyang Fu, Qiyuan Yu, Junsong Liu, Nan Gao\* and Hongdong Li\*

*State Key Lab of Superhard Materials, College of Physics, Jilin University, Changchun  
130012, China*

Corresponding Authors

Email: [gaon@jlu.edu.cn](mailto:gaon@jlu.edu.cn), [hdli@jlu.edu.cn](mailto:hdli@jlu.edu.cn)

**Table S1** Interlayer separation  $d$  of F-diamane with different functionals and corrections.

|            |         | $d$ (Å)           |
|------------|---------|-------------------|
| functional | PBE     | 2.054             |
|            | LDA     | 2.024             |
|            | HSE06   | 2.054             |
| correction | DFT-D3  | 2.054             |
|            | DFT-D2  | 2.055             |
|            | OptB86b | 2.054             |
|            | exp     | 2.05 <sup>1</sup> |

**Reference:**

(1) Bakharev, P. V.; Huang, M.; Saxena, M.; Lee, S. W.; Joo, S. H.; Park, S. O.; Dong, J.; Camacho-Mojica, D. C.; Jin, S.; Kwon, Y.; et al. Chemically induced transformation of chemical vapour deposition grown bilayer graphene into fluorinated single-layer diamond. *Nat. Nanotechnol.* **2020**, *15* (1), 59-66. DOI: 10.1038/s41565-019-0582-z.

**Table S2** Bond length of metal atom and carbon atom  $d_{M-C}$ , binding energy  $E_b$ , and cohesive energy  $E_{coh}$  for diamane with metal atom absorption (M-C<sub>64</sub>H<sub>31</sub> and M-C<sub>64</sub>F<sub>31</sub>).

|    | M-C <sub>64</sub> H <sub>31</sub> |            |                | M-C <sub>64</sub> F <sub>31</sub> |            |                |
|----|-----------------------------------|------------|----------------|-----------------------------------|------------|----------------|
|    | $d_{M-C}$ (Å)                     | $E_b$ (eV) | $E_{coh}$ (eV) | $d_{M-C}$ (Å)                     | $E_b$ (eV) | $E_{coh}$ (eV) |
| Li | 2.08                              | -1.59      | -1.66          | 2.07                              | -3.98      | -1.66          |
| Na | 2.42                              | -1.24      | -1.20          | 2.41                              | -3.56      | -1.20          |
| Mg | 2.34                              | -1.09      | -1.76          | 2.26                              | -2.27      | -1.76          |
| Al | 2.09                              | -2.78      | -3.67          | 2.37                              | -3.78      | -3.67          |
| K  | 2.76                              | -1.12      | -0.95          | 2.80                              | -3.84      | -0.95          |
| Ca | 2.42                              | -1.53      | -2.05          | 2.42                              | -3.62      | -2.05          |
| Ti | 2.19                              | -2.40      | -5.80          | 2.20                              | -3.67      | -5.80          |
| V  | 2.52                              | -1.99      | -5.89          | 2.17                              | -3.27      | -5.89          |
| Cr | 2.12                              | -1.88      | -4.47          | 2.21                              | -2.66      | -4.47          |
| Mn | 2.37                              | -1.62      | -4.13          | 2.31                              | -2.62      | -4.13          |
| Fe | 2.05                              | -2.28      | -5.21          | 1.99                              | -2.48      | -5.21          |
| Co | 1.99                              | -2.41      | -5.26          | 1.96                              | -3.06      | -5.26          |
| Ni | 1.95                              | -3.07      | -5.52          | 1.93                              | -4.06      | -5.52          |
| Cu | 1.97                              | -2.60      | -3.97          | 1.96                              | -2.81      | -3.97          |
| Zn | 2.36                              | -0.74      | -1.57          | 2.18                              | -0.98      | -1.57          |
| Pd | 2.07                              | -2.32      | -4.25          | 2.11                              | -2.43      | -4.25          |
| Ag | 2.23                              | -1.93      | -2.95          | 2.29                              | -2.17      | -2.95          |
| Pt | 2.05                              | -3.49      | -6.21          | 2.03                              | -2.85      | -6.21          |
| Au | 2.15                              | -2.78      | -3.61          | 2.16                              | -1.79      | -3.61          |

**Table S3** Bond length of metal atom with carbon atom, binding energy  $E_b$  and cohesive energy  $E_{coh}$  for diamane with metal atom embedding (M-C<sub>63</sub>H<sub>31</sub> or M-C<sub>63</sub>F<sub>31</sub>).

|    | M-C <sub>63</sub> H <sub>31</sub> |            |                | M-C <sub>63</sub> F <sub>31</sub> |            |                |
|----|-----------------------------------|------------|----------------|-----------------------------------|------------|----------------|
|    | $d_{M-C}$ (Å)                     | $E_b$ (eV) | $E_{coh}$ (eV) | $d_{M-C}$ (Å)                     | $E_b$ (eV) | $E_{coh}$ (eV) |
| Li | 2.06                              | -1.67      | -1.66          | 2.50                              | -3.89      | -1.66          |
| Na | 2.43                              | -0.60      | -1.20          | 2.94                              | -3.69      | -1.20          |
| Mg | 2.25                              | -0.45      | -1.76          | 2.24                              | -3.39      | -1.76          |
| Al | 1.82                              | -2.27      | -3.67          | 1.92                              | -5.15      | -3.67          |
| K  | 2.75                              | -0.76      | -0.95          | 3.52                              | -4.05      | -0.95          |
| Ca | 2.32                              | -1.86      | -2.05          | 2.55                              | -5.81      | -2.05          |
| Ti | 2.01                              | -5.54      | -5.80          | 2.14                              | -7.96      | -5.80          |
| V  | 1.97                              | -4.81      | -5.89          | 2.06                              | -6.94      | -5.89          |
| Cr | 1.94                              | -3.98      | -4.47          | 2.01                              | -6.02      | -4.47          |
| Mn | 1.90                              | -3.80      | -4.13          | 1.95                              | -5.11      | -4.13          |
| Fe | 1.86                              | -4.90      | -5.21          | 1.89                              | -6.10      | -5.21          |
| Co | 1.82                              | -5.89      | -5.26          | 1.86                              | -6.96      | -5.26          |
| Ni | 1.89                              | -5.19      | -5.52          | 1.91                              | -6.26      | -5.52          |
| Cu | 1.91                              | -2.07      | -3.97          | 1.99                              | -3.55      | -3.97          |
| Zn | 2.14                              | 0.37       | -1.57          | 2.03                              | -1.11      | -1.57          |
| Pd | 2.03                              | -3.29      | -4.25          | 2.05                              | -4.14      | -4.25          |
| Ag | 2.46                              | -0.24      | -2.95          | 2.38                              | -1.81      | -2.95          |
| Pt | 2.03                              | -5.30      | -6.21          | 2.03                              | -5.33      | -6.21          |
| Au | 2.26                              | -1.00      | -3.61          | 2.20                              | -1.25      | -3.61          |

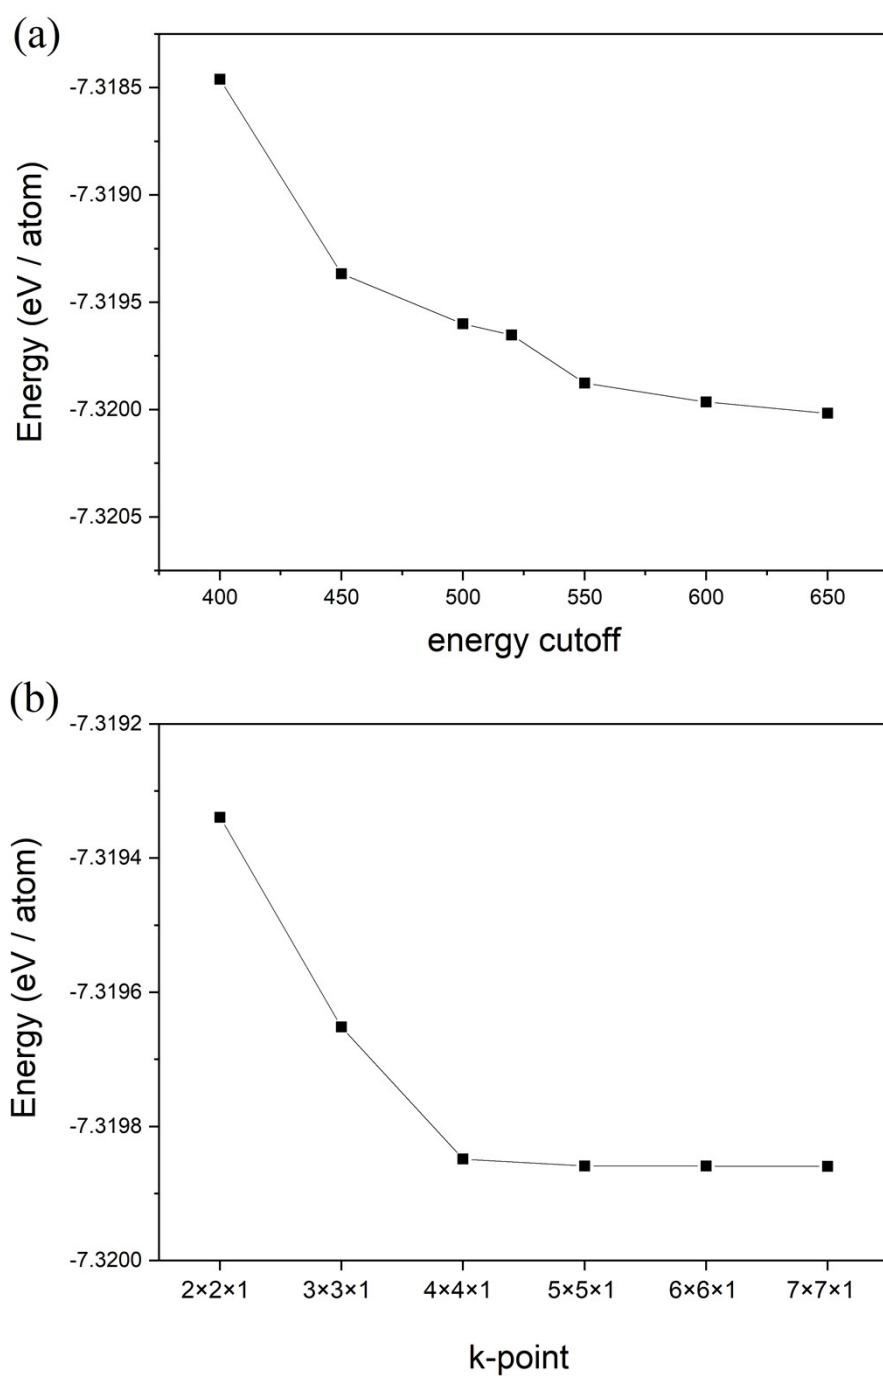

**Figure S1.** (a) Energy cutoff convergence test of sampling densities ranged from 400 to 650 eV, (b) *k*-point convergence test of sampling densities ranged from 2×2×1 to 7×7×1 for Li-C<sub>64</sub>H<sub>31</sub> as an example.

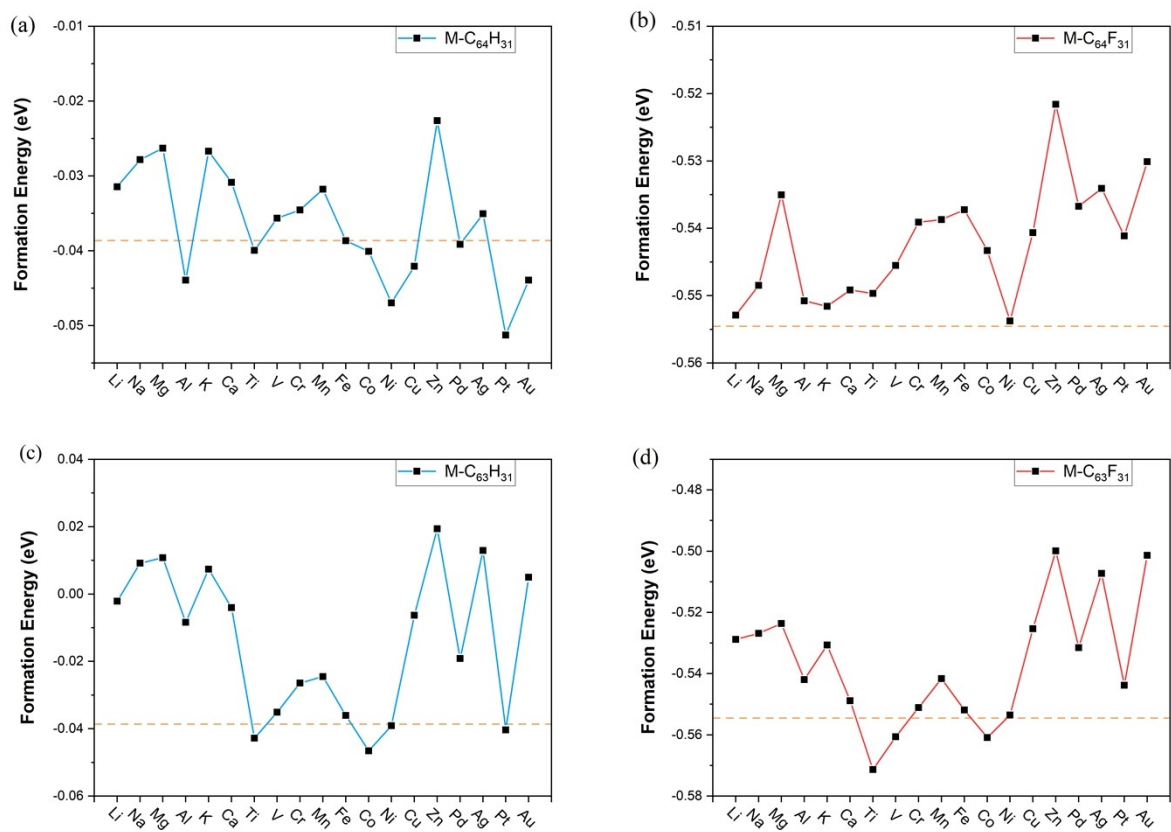

**Figure S2.** Formation energy ( $E_F$ ) for (a)  $M-C_{64}H_{31}$ , (b)  $M-C_{64}F_{31}$ , (c)  $M-C_{63}H_{31}$  and (d)  $M-C_{63}F_{31}$ . The dashed yellow lines represent the formation energy values of H-diamane or F-diamane without metal atoms.

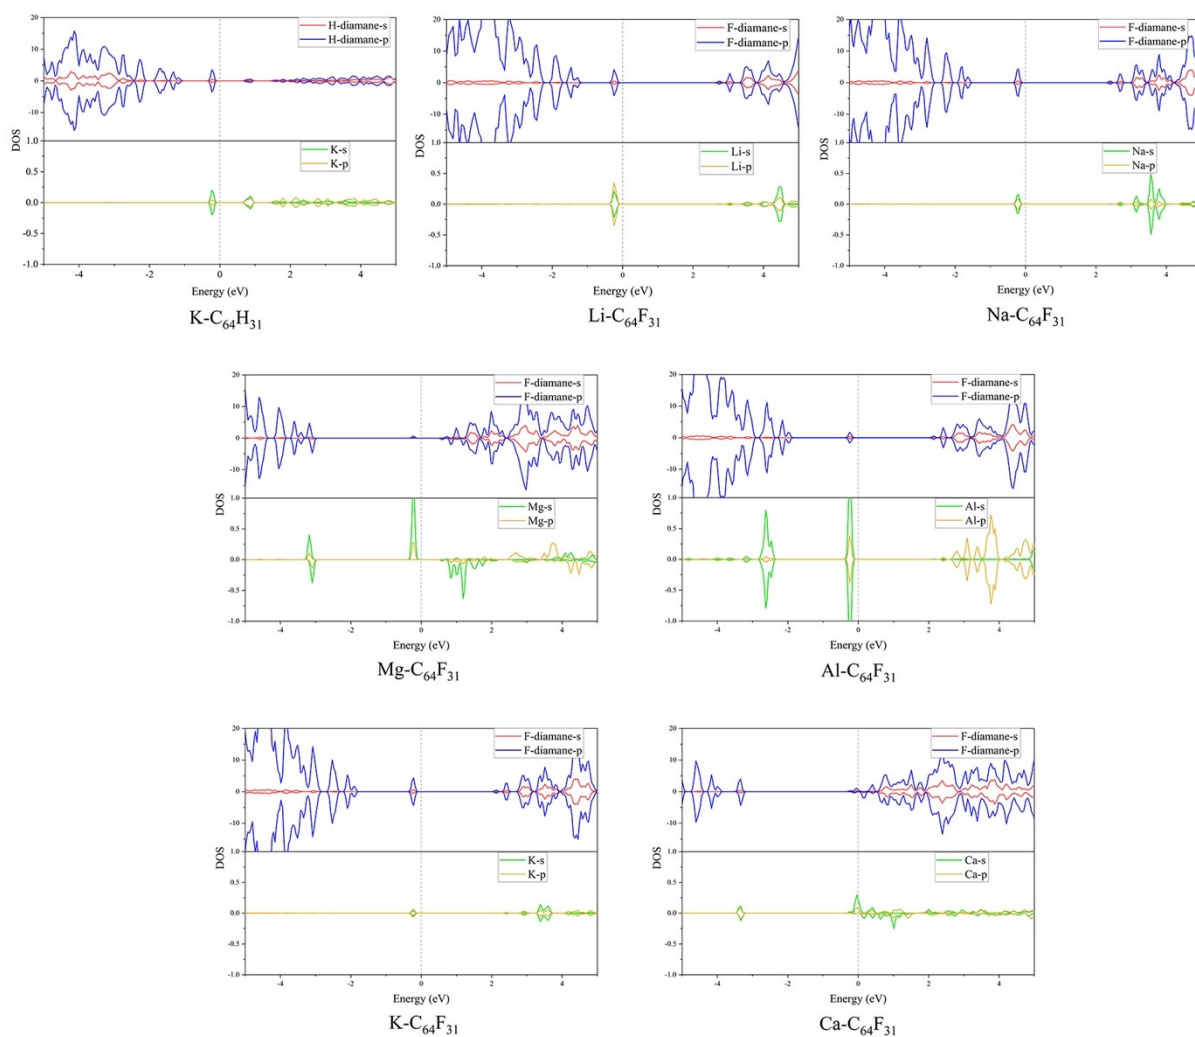

**Figure S3.** Density of states for diamane with metal atom absorption (M-C<sub>64</sub>H<sub>31</sub> and M-C<sub>64</sub>F<sub>31</sub>). The Fermi level is set at zero.

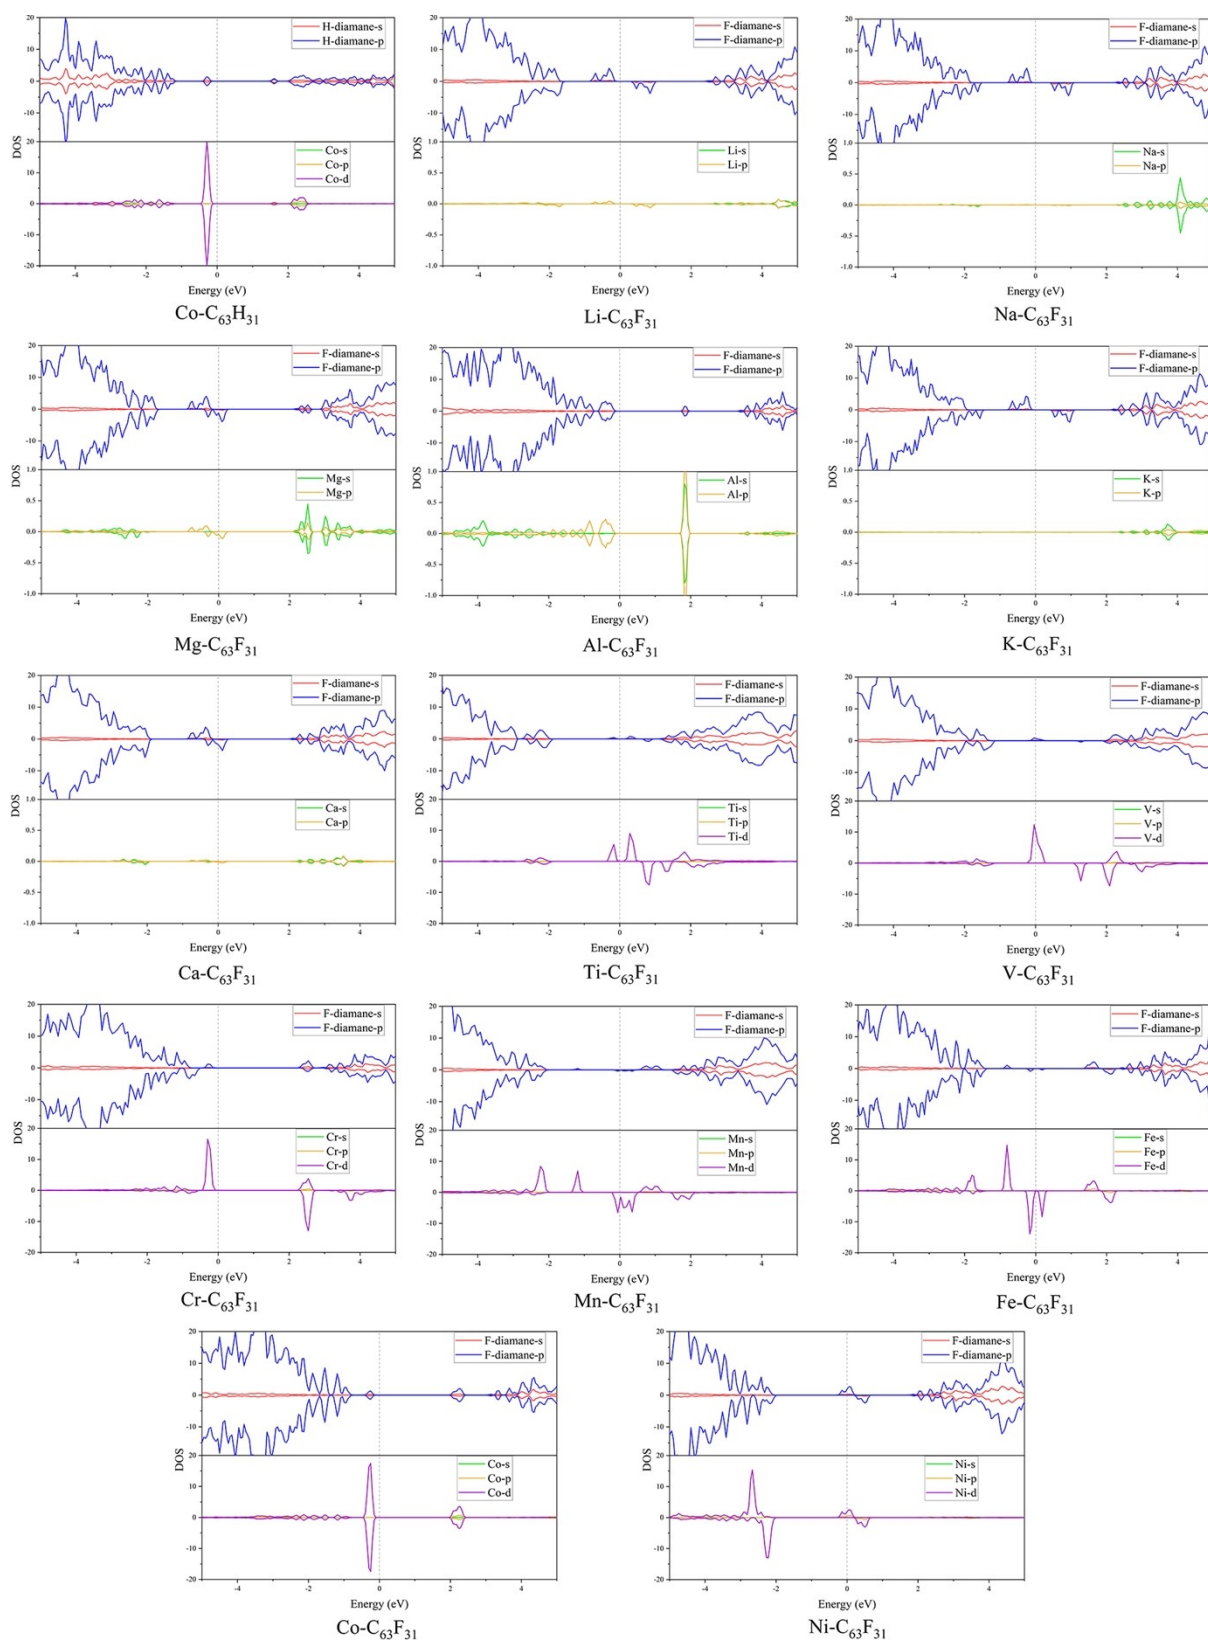

**Figure S4.** Density of states for diamane with metal atom embedding ( $M-C_{63}H_{31}$  or  $M-C_{63}F_{31}$ ). The Fermi level is set at zero.



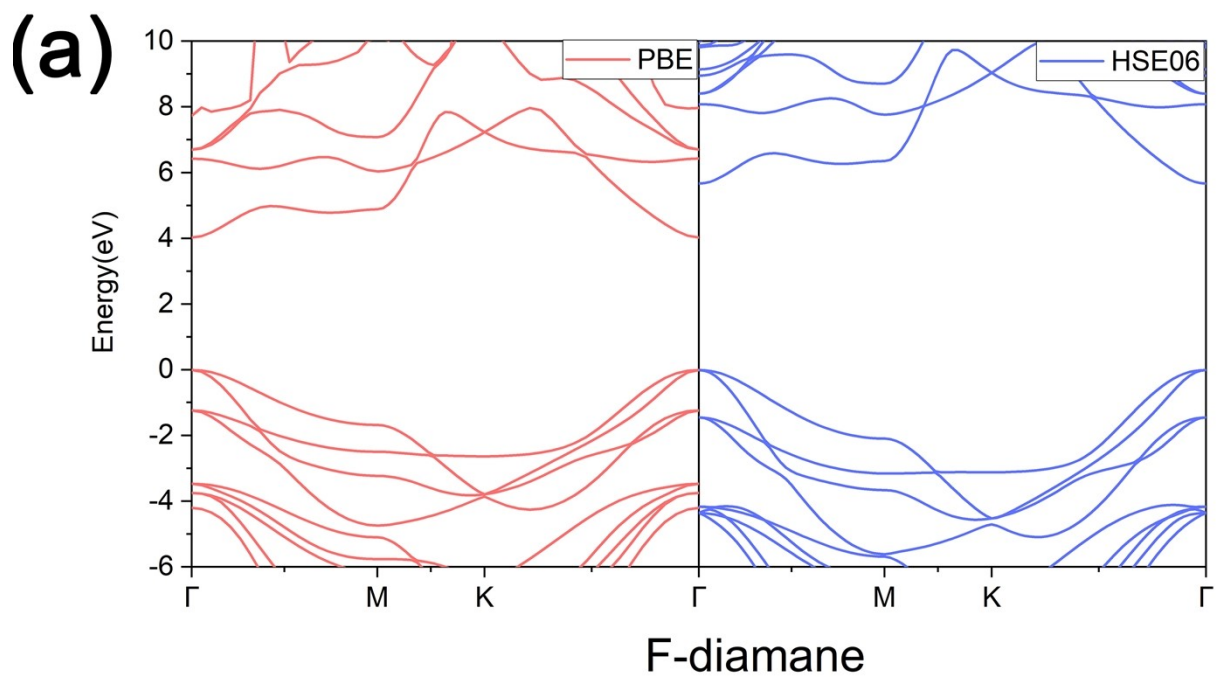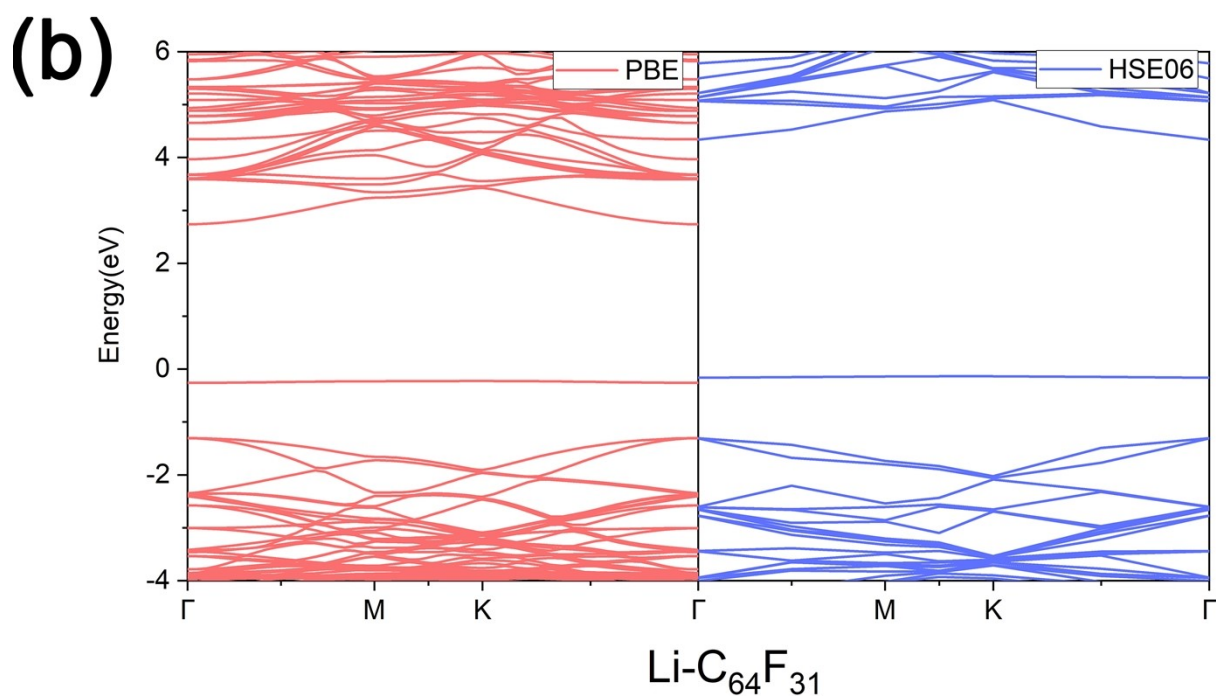

**Figure S5.** Band structures of (a) F-diamane, (b) Li-C<sub>64</sub>F<sub>31</sub> calculated by PBE and HSE06 functionals.

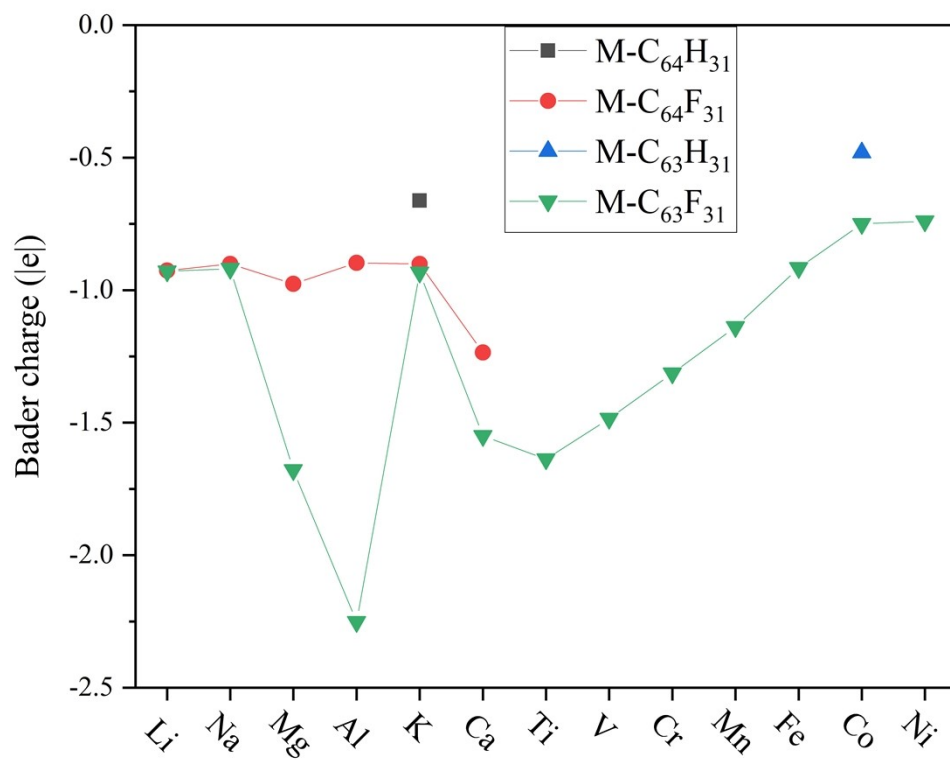

**Figure S6.** Bader charge values for diamane with metal atom doping and embedding.
